# Supplementary material
Source: ML conference proceedings conference paper supplement (https://openaccess.thecvf.com/content/ICCV2025/html/Liu_Debiased_Curriculum_Adaptation_ICCV_2025_paper.html)
Supplement: Supplementary file 1 [file Liu_Debiased_Curriculum_Adaptation_ICCV_2025_supplemental.pdf]

# Debiased Curriculum Adaptation for Safe Transfer Learning in Chest X-ray Classification

## Supplementary Material

### A. Full Results

#### A.1. Main Results

Due to the limited pages, we list the experimental results for Consolidation in Tab. 9, the experimental results for Pleural Effusion in Tab. 10, and the experimental results for Edema in Tab. 11.

#### A.2. Additional Results on Dermoscopic Dataset

To further validate the potential of DCA’s extension to other medical datasets, we conducted additional experiments on the dermatology dataset. HAM [42] and MSK [10] datasets from the widely used ISIC 2019 challenge are employed to verify performance on 3 diseases based on dermoscopic images. As in Tab 8, DCA achieves SOTA performance on three skin diseases, proving the potential to be extended to other types of medical imaging.

Table 8. From HAM to MSK for three diseases in ISIC challenge.

| Disease | Melanoma      | Dermatofibroma | Vascular lesion | Average       |
|---------|---------------|----------------|-----------------|---------------|
| DANN    | 82.349        | 85.010         | 91.733          | 86.364        |
| CDAN    | 81.747        | 84.785         | 94.669          | 87.067        |
| MCD     | 82.898        | 82.339         | 92.096          | 85.778        |
| MDD     | 84.127        | 89.278         | 92.859          | 88.755        |
| DCA     | <b>85.883</b> | <b>91.233</b>  | <b>98.604</b>   | <b>91.907</b> |

### B. Experimental Details

#### B.1. Dataset Processing

To maintain consistency across the four datasets, we filter out lateral chest X-ray images, retaining only frontal images. Each dataset is randomly divided into 80% training, and 20% testing. Since individual patients have multiple follow-up acquisitions, all data from a patient is assigned to a single subset only.

#### B.2. Implementation Details

We use **PyTorch** to implement our methods and fine-tune ResNet-50 pre-trained on ImageNet [37]. Following the standard protocols for unsupervised domain adaptation [34], all labeled source samples and unlabeled target samples participate in the training stage. We adopt mini-batch SGD with momentum of 0.9 and use the learning rate schedule of DANN [17], assigning a smaller learning rate  $lr = 0.001$  to the feature extractor and a larger learning rate  $lr = 0.01$  to the classifier. We resize the images to  $256 \times 256$ . Random cropping and horizontal flipping are

used as data augmentation techniques. The evaluation criterion is Area Under the Receiver Operating Characteristic (AUROC) [16] curve score.  $\gamma$  in the overall optimization function (Equation 10 in the paper) trades off the importance of curriculum adaptation and spectral debiasing, which is set 0.0002 in all experiments. To select pseudo labels with high confidence, we need two fixed thresholds. In the case of imbalance, thresholds of different classes often differ significantly. In DCA, the proposed Class-wise Spectral Debiasing, can effectively alleviate the problem by balancing the feature space of positive and negative classes. Therefore, in all experiments, we uniformly set the threshold of negative class (with label  $y = 0$ ) to 0.1 and the threshold of positive class (with label  $y = 1$ ) to 0.9.

### C. More Analysis

**Computational Complexity** The proposed Spectral Debiasing (SD) requires additional computational costs. SD computes the singular values on the feature matrix of a minibatch with the complexity of  $O(b^2d)$ , where  $d$  is the dimension of features and  $b$  is the batch size. Since  $b$  is often small, the overall computational budget of computing singular values is nearly negligible in the mini-batch SGD training. As shown in Fig. 6a, DCA achieves optimal performance with sub-optimal training time cost and controllable memory overhead.

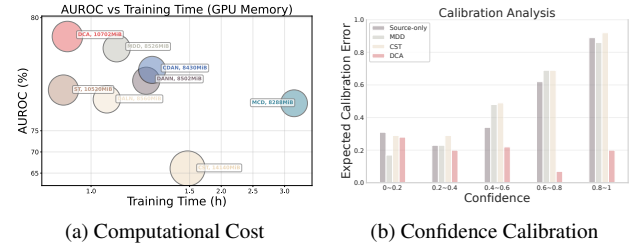

Figure 6. (a) Computational cost comparison with baselines. (b) Confidence calibration: ECE of different confidence bins.

**Calibration Analysis** DCA incorporates implicit confidence calibration. We use Expected Calibration Error (ECE) [20] to investigate this issue on the transfer task from CheXpert to NIH-CXR for Atelectasis. Confidence is defined as:  $\text{confidence} = 2 \times |0.5 - \text{predication}|$ . The smaller the ECE, the more reliable the model’s predictions. It can be observed from Fig. 6b that, compared to the baselines, DCA significantly reduces ECE, especially in the high-confidence bins, mitigating overconfidence issues and ensuring more reliable predictions.

Table 9. AUROC (%) on 12 transfer tasks across four domains for Consolidation.

| Method            | C→M           | C→N           | C→O           | M→C           | M→N           | M→O           | N→C           | N→M           | N→O           | O→C           | O→M           | O→N           | Average       |
|-------------------|---------------|---------------|---------------|---------------|---------------|---------------|---------------|---------------|---------------|---------------|---------------|---------------|---------------|
| Source-only       | 72.670        | 75.782        | 86.904        | 63.158        | 74.968        | 87.563        | 63.368        | 72.843        | 88.933        | 56.078        | 63.045        | 59.986        | 72.108        |
| DANN              | <b>73.674</b> | 74.925        | 85.033        | 63.793        | 75.314        | 86.008        | 62.980        | 73.674        | 90.593        | 52.448        | 59.081        | 59.998        | 71.460        |
| CDAN              | 73.125        | 73.605        | 84.743        | 63.763        | 74.578        | 85.744        | <u>63.657</u> | 73.125        | 86.298        | 53.176        | 53.899        | 56.153        | 70.156        |
| MCD               | 72.418        | 74.862        | 85.191        | 62.590        | 73.384        | 89.354        | 59.808        | 68.740        | 90.066        | 53.130        | 61.522        | <u>63.717</u> | 71.232        |
| MDD               | 73.249        | <u>75.928</u> | 83.847        | 63.396        | 75.145        | 92.306        | 63.378        | 72.833        | <b>93.570</b> | 55.783        | 59.896        | 63.584        | <u>72.743</u> |
| DALN              | 72.792        | 74.846        | 85.296        | 63.348        | 75.033        | 86.008        | 63.655        | 71.971        | 88.906        | 54.091        | 58.314        | 58.102        | 71.030        |
| ST                | 71.964        | 72.427        | <b>90.777</b> | 63.449        | 74.219        | <b>96.153</b> | 61.530        | 70.181        | 89.644        | <u>56.703</u> | <u>63.071</u> | 62.772        | 72.741        |
| CST               | 65.833        | 68.318        | 87.563        | <u>64.024</u> | <u>75.619</u> | 86.087        | 59.883        | 65.454        | 87.668        | 53.934        | 59.780        | 61.210        | 69.614        |
| <b>DCA (ours)</b> | <u>73.505</u> | <b>76.020</b> | <u>90.198</u> | <b>64.250</b> | <b>76.140</b> | <u>92.806</u> | <b>64.454</b> | <b>74.154</b> | <u>92.279</u> | <b>59.189</b> | <b>68.303</b> | <b>70.332</b> | <b>75.136</b> |

Table 10. AUROC (%) on 12 transfer tasks across four domains for Pleural Effusion.

| Method            | C→M           | C→N           | C→O           | M→C           | M→N           | M→O           | N→C           | N→M           | N→O           | O→C           | O→M           | O→N           | Average       |
|-------------------|---------------|---------------|---------------|---------------|---------------|---------------|---------------|---------------|---------------|---------------|---------------|---------------|---------------|
| Source-only       | 88.722        | 87.404        | 94.687        | 85.438        | 87.736        | 98.667        | 82.495        | 87.586        | 95.675        | 76.022        | 81.696        | 80.649        | 87.231        |
| DANN              | 88.470        | 85.654        | 88.544        | 85.165        | 87.515        | 97.935        | 81.622        | <u>87.557</u> | <u>96.245</u> | 67.954        | 72.077        | 74.768        | 84.459        |
| CDAN              | 88.744        | 85.486        | 88.218        | 84.916        | <b>87.753</b> | 97.198        | 81.889        | 87.397        | 96.126        | 69.380        | 78.213        | 78.682        | 85.334        |
| MCD               | 88.709        | 85.026        | <u>95.274</u> | 83.533        | 86.505        | 97.833        | 65.626        | 78.614        | <b>97.008</b> | 73.743        | <u>81.231</u> | 79.965        | 84.422        |
| MDD               | <u>88.941</u> | <u>86.747</u> | 90.376        | <b>85.659</b> | 87.101        | 94.819        | 82.318        | 87.221        | 96.037        | 74.413        | 79.133        | 81.962        | <u>86.227</u> |
| DALN              | 88.054        | 86.106        | 93.262        | 85.027        | 87.519        | <u>98.102</u> | 81.123        | 87.117        | 95.900        | 70.275        | 77.898        | 78.321        | 85.725        |
| ST                | 86.664        | 86.504        | 92.516        | 83.709        | 87.552        | <b>98.107</b> | 79.642        | 84.074        | 96.236        | <u>75.311</u> | 74.846        | 76.382        | 85.129        |
| CST               | 82.631        | 71.579        | 92.944        | 85.314        | 87.232        | 97.392        | <b>83.881</b> | 85.245        | 95.543        | 69.071        | 72.961        | <b>84.396</b> | 84.016        |
| <b>DCA (ours)</b> | <b>88.941</b> | <b>87.597</b> | <b>96.165</b> | <u>85.585</u> | <u>87.737</u> | 97.577        | <u>82.752</u> | <b>88.035</b> | 95.539        | <b>75.592</b> | <b>81.436</b> | <u>82.189</u> | <b>87.429</b> |

Table 11. AUROC (%) on 12 transfer tasks across four domains for Edema.

| Method            | C→M           | C→N           | C→O           | M→C           | M→N           | M→O           | N→C           | N→M           | N→O           | O→C           | O→M           | O→N           | Average       |
|-------------------|---------------|---------------|---------------|---------------|---------------|---------------|---------------|---------------|---------------|---------------|---------------|---------------|---------------|
| Source-only       | 86.560        | 88.763        | 96.803        | 80.245        | 87.118        | 95.429        | 65.264        | 73.164        | 96.565        | 69.243        | 73.685        | 82.941        | 82.982        |
| DANN              | 85.724        | 86.601        | 95.271        | <b>81.104</b> | <u>87.863</u> | 97.701        | <b>72.681</b> | 79.031        | <b>98.494</b> | 58.593        | 67.868        | 77.649        | 82.382        |
| CDAN              | 85.893        | 85.642        | 96.909        | 80.873        | 87.553        | <u>97.728</u> | 71.061        | <u>79.263</u> | 97.781        | 57.452        | 58.625        | 70.391        | 80.764        |
| MCD               | 86.233        | 87.323        | 96.513        | 76.084        | 87.761        | <b>97.992</b> | 61.640        | 72.876        | 97.199        | 55.178        | 56.332        | 66.454        | 78.465        |
| MDD               | <b>86.558</b> | <u>88.169</u> | <u>97.173</u> | <u>80.894</u> | 86.989        | 95.773        | 63.583        | 75.520        | <b>97.913</b> | <u>68.707</u> | 72.404        | <u>81.078</u> | 82.897        |
| DALN              | 86.099        | 87.651        | 96.803        | 80.131        | 87.671        | 95.139        | 70.036        | 76.937        | 94.003        | <u>68.552</u> | 72.932        | 81.065        | <u>83.085</u> |
| ST                | 85.533        | 86.777        | 95.799        | 79.352        | 86.967        | 94.954        | 69.822        | 77.838        | 96.037        | 68.154        | <u>74.338</u> | 79.432        | 82.917        |
| CST               | 84.799        | 63.524        | 95.165        | 80.435        | 82.101        | 88.692        | 68.469        | 77.168        | 79.894        | 65.275        | 65.630        | 77.195        | 77.362        |
| <b>DCA (ours)</b> | <u>86.400</u> | <b>88.513</b> | <b>98.943</b> | 80.440        | <b>88.060</b> | 97.120        | <u>72.601</u> | <b>80.135</b> | 96.645        | <b>70.400</b> | <b>76.070</b> | <b>84.340</b> | <b>84.972</b> |
